# Supplementary material for: Facile fabrication of a CoO/g-C3N4p–n heterojunction with enhanced photocatalytic activity and stability for tetracycline degradation under visible light
Source: Royal Society of Chemistry journal article supplement (doi:10.1039/c7cy00960g), 2017-01-01
Supplement: c7cy00960g1.pdf [file c7cy00960g1.pdf]

## Facile fabrication of CoO/g-C<sub>3</sub>N<sub>4</sub> p-n heterojunction with enhanced photocatalytic activity and stability for tetracycline degradation under visible light

### Supporting information

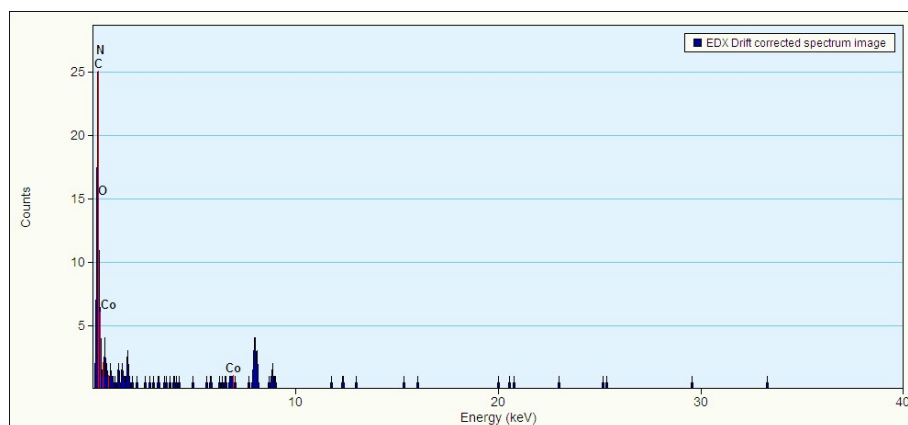

Fig.S1. The EDX spectrum of 30% CO-CN photocatalyst.

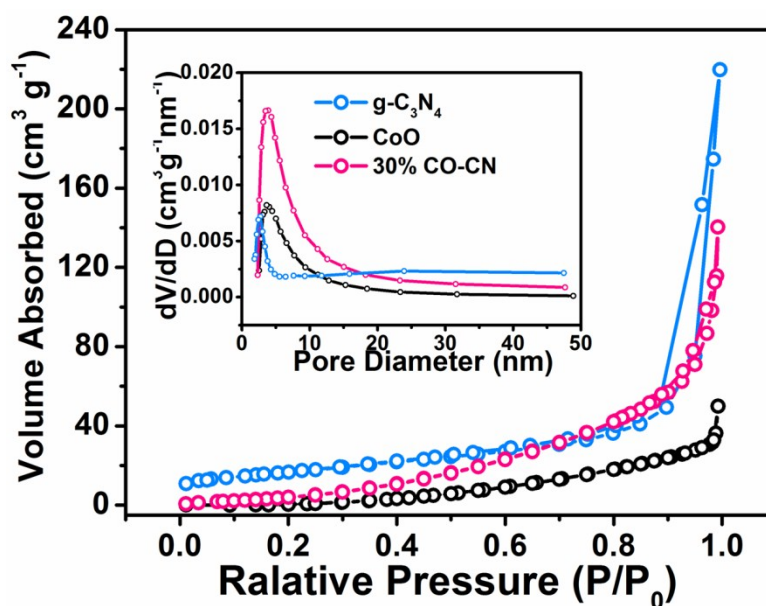

Fig.S2. N<sub>2</sub> adsorption-desorption isotherms and pore size distributions (inset) of as-prepared samples.
